# Supplementary material for: Lipopolysaccharide upregulates miR-132/212 in Hirschsprung-associated enterocolitis, facilitating pyroptosis by activating NLRP3 inflammasome via targeting Sirtuin 1 (SIRT1)
Source: Aging (Albany NY). 2020 Sep 20;12(18):18588–602. doi: 10.18632/aging.103852 (PMC7585123; doi:10.18632/aging.103852)
Supplement: Supplementary Figure 1 [file aging-12-103852-s002..pdf]

## SUPPLEMENTARY FIGURE

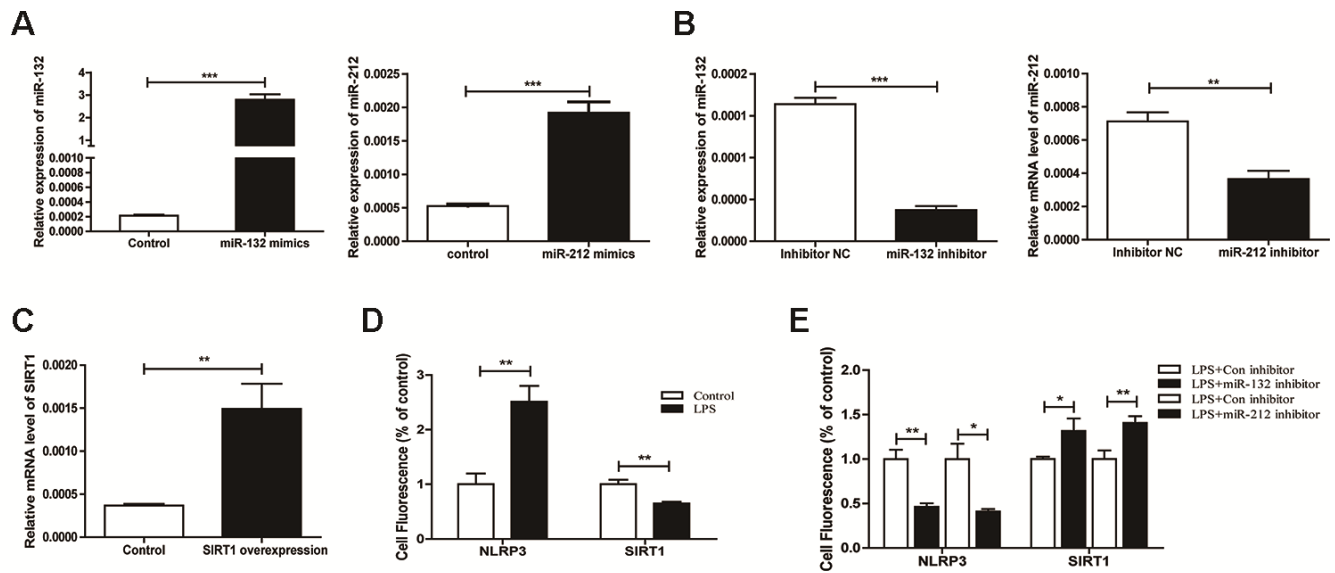

**Supplementary Figure 1.** (A and B) The miRNA levels of miR-132 and miR-212 were detected by qRT-PCR after HT29 cell line was transfected with miR-132/-212 mimics or inhibitors. (C) SIRT1 mRNA level in HT29 cell line was detected by qRT-PCR after treated with SIRT1 overexpression. (D and E) Cell fluorescence quantitative analysis of NLRP3 and SIRT1 showed high staining intensity of NLRP3 and inverse trend of SIRT1 in HT29 cell line treated with 1000ng/ml LPS, which could be reversed by miR-132/-212 inhibitors.
